1 **Self-management of depression and anxiety amongst frail**  
2 **older adults in the United Kingdom: a qualitative study**

3

4 Pushpa Nair<sup>1\*</sup>, Kate R. Walters<sup>1</sup>, Su Aw<sup>2</sup>, Rebecca L. Gould<sup>3</sup>, Kalpa Kharicha<sup>4</sup>,  
5 Marta Buszewicz<sup>1</sup>, Rachael Frost<sup>1</sup>

6

7

8 <sup>1</sup> Department of Primary Care and Population Health, University College London Medical  
9 School (Royal Free Campus), London, United Kingdom.

10 <sup>2</sup>National University of Singapore, Saw Swee Hock of Public Health, Singapore.

11 <sup>3</sup>Division of Psychiatry, University College London, London, United Kingdom.

12 <sup>4</sup> Campaign to End Loneliness, What Works Centre for Wellbeing, The Evidence Quarter,  
13 Albany House, London, United Kingdom.

14

15

16 \*Corresponding author

17 Email: [pushpa.nair@nhs.net](mailto:pushpa.nair@nhs.net) (PN)

18

19

20

21

22

23

## 24 **Abstract**

25 **Objectives:** Depression and anxiety are common in frail older people and are associated  
26 with high levels of morbidity and mortality, yet they typically face greater barriers to  
27 accessing mental health treatments than younger people and express preferences for self-  
28 managing their symptoms. This study aims to explore frail older adults' experiences of self-  
29 managing symptoms of depression and/or anxiety.

30 **Design:** Qualitative semi-structured interviews, exploring experiences of depression and/or  
31 anxiety, ways participants self-managed these and the contexts within which this took place.  
32 Interviews were audio-recorded and transcribed verbatim.

33 **Participants:** 28 frail older adults in the United Kingdom, purposively sampled for  
34 neighbourhood, frailty and symptoms of anxiety/depression.

35 **Analysis:** Thematic analysis to inductively derive themes from the data.

36 **Results:** Our findings suggest that frail older adults find maintaining routines, engaging in  
37 meaningful and creative activities and socialising important to self-manage depression and  
38 anxiety. These could all be adapted to the level of frailty experienced. Stoicism, acceptance,  
39 faith or addressing the perceived cause were helpful in some situations and for some  
40 personalities. Distraction and avoidance were helpful for more severe symptoms or where  
41 the causes of symptoms could not be resolved. Self-management strategies were less well-  
42 established for anxiety symptoms, especially when linked to newer health fears and worries  
43 about the future.

44 **Conclusions:** Developing services and sources of information that support and facilitate key  
45 therapeutic components of self-management, which align with older adults' preferred coping  
46 styles and take into account levels of frailty, may be a way of supporting frail older people  
47 waiting for mental health treatments or those who prefer not to access these. Greater  
48 awareness of anxiety and how it can be self-managed in frail older people is needed.

49

## 50 **Introduction**

51           Worldwide, approximately 11% of adults aged 65+ years are frail [1]. Although  
52 lacking a universal definition, frailty is generally conceptualized as a dynamic process  
53 involving deficiencies across multiple physiological systems, with diminishing reserves and  
54 increased vulnerability to poor health outcomes [2], encompassing symptoms such as weight  
55 loss, muscle weakness, low physical activity and low energy levels [3]. However,  
56 psychological aspects of frailty are often overlooked [4].

57           Depression has a prevalence of 9% in adults aged 75+ years [5], and anxiety 15% in  
58 those aged 60+ [6]. Frail older adults are four times more likely to experience anxiety and/or  
59 depression than non-frail older adults [7]. Both are associated with higher levels of functional  
60 impairment [8, 9], cognitive decline [9, 10, 11] and healthcare service utilization [12, 13],  
61 especially when combined with frailty [14], and both remain commonly under-diagnosed [15].  
62 Depression in older adults has additionally been linked to greater risk of falls [16] and self-  
63 neglect [17], with a reciprocal relationship with frailty [18] and higher relapse rates than in  
64 earlier life [19]. The mental health of older adults has become an even more urgent concern  
65 considering the negative impact of the Covid-19 pandemic on wellbeing in this group [20].

66           Uptake of mental health services amongst older adults is poor - up to 70% of adults  
67 aged 55+ in the United States (US) with mood disorders do not access mental health  
68 services [21]. Within the National Health Service (NHS) in the United Kingdom (UK), mental  
69 health services can be freely accessed through a GP referral or self-referral; however only  
70 6.2% of national referrals to psychological therapy services within UK primary care settings  
71 are for those aged 65+, and this drops to 2.1% for those aged >75 [22], with an even greater  
72 reduction in referrals seen during the recent Covid-19 pandemic [23]. There is evidence that  
73 many older adults view depression as a normal part of ageing and often prefer self-  
74 management approaches over seeking professional help [24, 25]. Practical difficulties such  
75 as limitations in mobility and transport costs have also been cited as contributing to lower  
76 levels of access, particularly amongst frailer older adults [26]. There is evidence that frail

77 older people prefer to access mental health treatments through their GP, but experience  
78 problems accessing their GP or finding information from alternative sources [27]. In addition,  
79 there is evidence that healthcare professionals experience a wide range of barriers in  
80 referring older people to psychological therapies [27]. Those who are referred for  
81 psychological therapies can find they are on waiting lists as long as 12 months in some  
82 areas, with little support available to them whilst waiting for this service [28]. Waiting times  
83 have been further exacerbated by the Covid-19 pandemic [23], with certain services only  
84 offering remote access, potentially leading to the digital exclusion of some older adults [29].

85         The value of current treatments for mood disorders in frailer populations is also  
86 uncertain. The efficacy of antidepressants is less clear in frailer populations [30], with  
87 multiple medications a known contributor to frailty itself [31]. Despite this, there is evidence  
88 that the oldest old are more likely to be prescribed medication than be referred for  
89 psychological therapies compared to those who are younger [32]. Psychological therapies in  
90 frail older people may also be less effective, may need to be adapted to account for mild  
91 cognitive impairment [33, 34], or may be less acceptable; for example, a US survey showed  
92 that those aged 85+ preferred supportive treatment for anxiety rather than Cognitive  
93 Behavioral Therapy [35].

94         In this context, self-management strategies may play a significant role in improving  
95 mood disorders in this population [36]. Self-management is defined as ‘taking increased  
96 responsibility for one’s own health, behaviour and well-being’ [37]. It can encompass lifestyle  
97 changes, problem solving, goal-setting and symptom monitoring [38, 39]. It is important to  
98 distinguish self-management, which focuses more on maintaining wellbeing and reducing  
99 relapses [39], from self-help, which aims to treat episodes of depression or anxiety using  
100 remote or instructional CBT-based approaches [40]. Whilst help-seeking is also a part of  
101 self-management, barriers to this have been extensively documented in older people [25,  
102 41]. Ways that older people can support themselves align with a preference for feeling  
103 independent at a time of increasing dependence [27], fear of stigma and a potential  
104 inclination to deal with emotional problems on their own [25, 42, 43]. Self-management thus

105 has the potential to improve older adults' quality of life by facilitating feelings of  
106 empowerment and self-efficacy [38, 42].

107         Self-management in older populations has most commonly been studied in  
108 connection with long-term medical conditions [43, 44, 45], with studies showing good self-  
109 management outcomes. Programmes adapting the collaborative chronic care model (CCM),  
110 which includes self-management as a key component, to mental health care [46] have also  
111 shown promising outcomes for depression across all age groups [47, 48, 49]. However, most  
112 studies specifically exploring self-management of mood disorders have focused on younger  
113 populations and found that a wide range of strategies are used [50, 51], such as physical  
114 activity, social engagement, being proactive and having knowledge about the condition [39,  
115 52].

116         Limited qualitative literature exploring aspects of self-management of mood disorders  
117 in older adults have focused mainly on depression in 'younger old' (<75 years) non-frail  
118 groups, highlighting the importance of strategies such as socializing, going out, engaging in  
119 religion, exercising and keeping up hobbies (findings summarized in three qualitative meta-  
120 analyses [25, 53, 54]). More recent studies [41, 42, 55, 56] have highlighted that a sense of  
121 identity, meaning and experiential knowledge are particularly important for older adults'  
122 capacity to self-manage depression. There is much less literature exploring self-  
123 management techniques for *anxiety* in older adults. Furthermore, we know little about the  
124 capacity and motivation of *frail* older people to self-manage depressive symptoms, despite  
125 the higher prevalence of symptoms in this subgroup, and much less about how they view  
126 and self-manage anxiety symptoms. Knowing more about their self-management techniques  
127 may help develop supportive resources that recommend acceptable strategies for alleviating  
128 mood symptoms in this population.

129         In this study, we therefore aimed to explore self-management strategies for both  
130 anxiety and depression amongst the frailer 'older old' group (75+ years), for whom some  
131 strategies (e.g. exercise, socializing) may be compromised by reduced mobility and multiple  
132 health comorbidities.

133

## 134 **Research Design and Methods**

135           The voices of frail older adults are often absent in research [57] and we therefore  
136 chose a qualitative methodology that sought to elicit what helped them self-manage  
137 symptoms, how frailty influenced this and whether their strategies differed from those of  
138 younger-old adults.

### 139 **Ethics statement**

140           The study was approved by NHS Camden and Kings Cross Research Ethics  
141 Committee (ref 17/LO/1963) and research was carried out in accordance with the ethical  
142 principles for medical research involving human subjects expressed in the World Medical  
143 Association Declaration of Helsinki [58]. Informed written consent was obtained for all  
144 participants involved in the study.

### 145 **Participants**

146           We recruited 28 participants in total from five UK general practices, across one semi-  
147 rural (n=10), one suburban (n=4) and three urban areas (n=14), in order to sample  
148 neighbourhoods with different ethnicities, socioeconomic backgrounds, and variable access  
149 to mental health services. The UK has a free national healthcare system (NHS) and referrals  
150 to mental health services are primarily accessed through general practice, although patients  
151 are also able to self-refer. Data was collected in 2018.

### 152 **Inclusion Criteria**

153           Practice staff and general practitioners (GPs) searched their patient lists to identify  
154 older adults (aged 75+), classed as moderately to severely frail according to their practice's  
155 frailty register, who were currently experiencing symptoms of depression and/or anxiety. We  
156 asked practices to include a mix of those with and without a previously recorded diagnosis of

157 depression and/or anxiety in their medical notes, as depression and anxiety are often under-  
158 diagnosed in this population and we wanted to also include those who were currently  
159 experiencing symptoms but did not have a formal diagnosis and had not accessed previous  
160 help.

## 161 **Exclusion Criteria**

162 Older adults with advanced dementia, and those who had <6 months life expectancy  
163 were excluded.

## 164 **Procedure**

165 Practices posted invitation letters (with pre-paid postal reply slips) to patients who  
166 met the above inclusion criteria, and included study information leaflets containing brief  
167 screening questions for symptoms of anxiety and depression to encourage participants to  
168 self-identify (adapted from the 2-item Patient Health Questionnaire and 2-item Generalized  
169 Anxiety Disorder scale, which are both validated in older populations [59, 60] , but shortened  
170 and with the 2-week timescale changed to 'recently'). Interested participants returned reply  
171 slips to the two primary investigators (PN and RF) and were then telephone-screened to  
172 ensure they met the inclusion criteria, by using the same questions as in the leaflet to  
173 confirm symptoms, and asking about functional difficulties to confirm frailty. Of the 263 postal  
174 invites sent out, we received 41 positive responses, of which 28 were deemed eligible for  
175 study inclusion through screening, and 42 negative responses.

## 176 **Data Collection**

177 We collected data through individual semi-structured interviews, conducted face-to-  
178 face at participants' homes (or another location if requested). Interviews were conducted by  
179 PN (n=9, an academic GP, not disclosed to participants unless directly asked) and RF  
180 (n=19, a health services researcher). Terms such as 'low mood' and 'worry' were used at the  
181 beginning of interviews to reduce any perceived stigma, but terminology was adapted to  
182 reflect participants' own language as interviews progressed. Each interviewer observed 1-2  
183 of the other's interviews to ensure a consistent approach. Interviews lasted approximately

184 one hour (range 34-89 minutes) and were audio-recorded. The interview topic guide was  
185 developed with the input of the whole research team, including our two patient and public  
186 involvement (PPI) representatives (who were older adults from diverse backgrounds  
187 interested in mental health research in older people) and was modified as interviews  
188 progressed. We asked interviewees about their typical week, past and present experiences  
189 of low mood and anxiety, any coping and self-management strategies, social/carer networks,  
190 and their views on treatments, help-seeking and suggestions for improvements in mental  
191 health services (the full topic guide can be found in [61]). As there were rich data across a  
192 wide range of themes, this current paper focuses on the contexts and forms of self-  
193 management of mood symptoms. Data related to help-seeking, current health care  
194 treatments and service improvement have been published elsewhere [61]. At the end of  
195 each interview, we collected demographic data. Participants were provided with a list of  
196 relevant support services, an Independent Age depression guide [62] and a £20 voucher.  
197 Audio-recorded interview data were transcribed verbatim by an external transcription  
198 service, and anonymized and verified for accuracy by the interviewer.

## 199 **Data analysis**

200 We used thematic analysis to analyze our data from a constructivist perspective,  
201 which emphasizes the importance of multiple perspectives, contexts and values [63]. Our  
202 team included two health services researchers (RF, KK), three academic GPs (KW, MB,  
203 PN), two psychologists (RG, SA) and two PPI members (WD and SL). All transcripts were  
204 read by PN and RF and at least one other team member. PN and RF developed a thematic  
205 framework (which can be found in [61]), which was refined at a team meeting. PN, RF and  
206 SA coded transcripts line-by-line using NVivo 12 [64], according to the thematic framework.  
207 After coding three pilot transcripts, PN, RF and SA met to check for coding consistency and  
208 refine the thematic framework. Relevant headings from the thematic framework included:  
209 current experiences of depression/anxiety, influencing contextual factors, impact of physical  
210 health/frailty, life history and self-management strategies. PN and RF had regular meetings  
211 with the team to discuss, agree on and refine emerging analytical themes. Saturation was

| Demographics         | Number of Participants   |
|----------------------|--------------------------|
| Age mean; range      | 80.71 years; 75-88 years |
| Gender (male:female) | 9:19                     |

212 considered to have occurred after 26 interviews, with minor and wider collective themes  
213 accounted for, and two further interviews were conducted to corroborate this.  
214

## 215 **Results**

216 We recruited 28 participants with a mean age of 80.71 (SD 4.07, range 75-88).  
217 Participants were approximately two-thirds female (n=19) and predominantly White British  
218 (n=22). Ten participants were receiving Pension Credit, an indicator of low income in the UK  
219 (see Table 1 for demographic details). Whilst only eight participants reported receiving a  
220 formal diagnosis from a clinician (in their medical notes) of depression, anxiety or both,  
221 telephone screening identified nearly half the participants as experiencing current symptoms  
222 of both anxiety and depression, with the rest experiencing one or the other.

223

224 **Table 1. Demographic Characteristics of Study Participants**

|                           |                            |    |
|---------------------------|----------------------------|----|
| Neighbourhood             | Urban                      | 14 |
|                           | Suburban                   | 4  |
|                           | Semi-rural                 | 10 |
| Ethnicity                 | White British              | 22 |
|                           | Black Caribbean            | 4  |
|                           | Indian                     | 1  |
|                           | White Irish                | 1  |
| Country of birth          | United Kingdom             | 22 |
|                           | Ireland                    | 1  |
|                           | Trinidad                   | 2  |
|                           | Jamaica                    | 2  |
|                           | Mauritius                  | 1  |
| Ethnicity                 | White British              | 22 |
|                           | Black Caribbean            | 4  |
|                           | Indian                     | 1  |
|                           | White Irish                | 1  |
| Marital status            | Married                    | 8  |
|                           | Widowed                    | 10 |
|                           | Separated                  | 2  |
|                           | Divorced                   | 7  |
|                           | Single                     | 1  |
| Living situation          | Alone                      | 17 |
|                           | With spouse                | 8  |
|                           | With other family          | 3  |
| Housing                   | Owner-occupied             | 16 |
|                           | Council rented             | 7  |
|                           | Housing association rented | 2  |
|                           | Sheltered housing          | 2  |
|                           | Private rented             | 1  |
| Age completed education   | Before 15 years            | 8  |
|                           | 15-17 years                | 7  |
|                           | 17-20 years                | 6  |
|                           | Over 21 years              | 7  |
| Pension type              | State                      | 28 |
|                           | Employer                   | 17 |
|                           | Private                    | 3  |
|                           | Pension credits            | 10 |
| Diagnosis (self-reported) | Depression                 | 4  |
|                           | Anxiety                    | 4  |
|                           | Depression & Anxiety       | 3  |
|                           | No diagnosis               | 16 |
|                           | Unsure                     | 1  |
| Telephone screening       | Depression symptoms        | 10 |
|                           | Anxiety symptoms           | 5  |
|                           | Both                       | 13 |

225

226

Participants reported a range of experiences of depression, ranging from transient

227

periods of feeling down, which varied depending on physical health and levels of functioning,

228 to constant levels of low mood, which were often underpinned by family conflict, financial  
229 difficulties or past traumatic life experiences. In terms of anxiety, some participants reported  
230 frequently worrying about ‘silly little things’, whilst others had strong health-related fears or  
231 fears about the future, and a few reported constant levels of worry about everything. As  
232 many participants experienced both anxiety and depression, it was sometimes difficult to  
233 distinguish differences in the way that they self-managed each, but this is highlighted where  
234 possible in the results. This paper reports on the wide range of approaches used by  
235 participants to manage symptoms of depression and anxiety, incorporating four key themes:  
236 1.) Impact of frailty 2.) Engaging in meaningful routines and activities; 3.) Socializing; 4.)  
237 Internal mental and emotional coping strategies.

238

## 239 **Impact of frailty**

240 Participants reported changes in perceived identity resulting from functional decline,  
241 illness and fears over losing independence, which negatively affected their mood and  
242 wellbeing:

243

244 *‘Old age isn’t like ‘flu. You get worse, like. That’s what worries me, and I think I*  
245 *don’t want to be a nuisance.’* (White British Female, age 81-85, depression  
246 and anxiety symptoms)

247

248 Many mentioned not being able to use strategies that were previously helpful in managing  
249 their mood due to changes in functional levels. One participant reported no longer being able  
250 to read books due to a deterioration in her eyesight, whilst others reported not being able to  
251 go out as much due to limitations in mobility or chronic health conditions. This also impacted  
252 on their ability to socialise and exercise, as well as continuing with previously enjoyed  
253 hobbies, such as cooking and shopping. For participants who had become carers, their  
254 changes in circumstances often meant that they were no longer able to engage in activities  
255 that had previously been important to them for maintaining wellbeing.

256

257 *'I used to do country dancing. And, as I say, now it's – well I suppose your*  
258 *wings are clipped, ain't they, apart from when he goes to the Day Center'.*  
259 (White British Female, age 81-85, anxiety symptoms)  
260  
261 *'I think the only thing that I'm missing out on is to go out and have, you know, do*  
262 *some exercise or some clubbing or something. And then I can come home, and, you*  
263 *know, feel like I'm somebody.'* (Black Caribbean Female, age 76-80, anxiety and  
264 depression symptoms)

265  
266 However, within the limitations of their frailty, participants described a wide range of  
267 strategies that helped them cope with symptoms of low mood and/or anxiety. They had  
268 developed these over their life-time and were able to implement them according to their  
269 current levels of functioning, as outlined below.

270

## 271 **Engaging in meaningful routines and activities**

### 272 **Maintaining a routine**

273 The ability to maintain a routine emerged as integral to many participants' sense of  
274 identity. Even if participants could not do some of the activities they previously enjoyed,  
275 being able to socialize or keep the house tidy were all seen as representative of their ability  
276 to continue with 'normal' life.

277

278 *'The more you go out, the more you become a normal, still remain a normal,*  
279 *active person'.* (White British Female, age 81-85, anxiety symptoms)

280

281 Participants often used downward social comparisons, comparing themselves favorably to  
282 other older adults who had lost their independence, and who seemed to represent 'the other'  
283 they feared turning into. Despite these activities often being more difficult to uphold or having  
284 to be adapted as people became frailer, they provided some structure to the day and were  
285 used by some to combat low motivation and keep negative thoughts at bay.

286

287 *'I've got a routine that I keep each morning. I do that, not because I'm*  
288 *pedantic, but because if I don't, I'm letting everything slide, you know.'* (White  
289 British Male, age 86-90, depression symptoms)  
290  
291 Family, neighbours and carers were generally identified as helpful in assisting them to keep  
292 to a routine and therefore supporting mental wellbeing. However, this needed to be carefully  
293 balanced with not appearing too dependent, and some feared that sharing any hint of being  
294 unable to keep up these activities with their families would either worry them or result in loss  
295 of their independence.

296  
297 *'I want to do things for myself, continue as long as I can, you know. I don't*  
298 *want them (family) running and worrying and whatever...'* (Black Caribbean  
299 Female, age 76-80, anxiety and depression symptoms)

### 300 **Meaningful and creative activities**

301 In addition to upholding a routine, activities that promoted a sense of meaning and  
302 creativity were also important for mood and wellbeing, particularly for participants whose  
303 frailty limited their ability to go out. Creative activities, such as poetry, painting, writing,  
304 patchwork, music and photography, helped participants express and make sense of their  
305 emotions, and often helped to contextualize earlier life experiences and memories.

306  
307 *'That's why I think I like patchwork because you use old material, you know,*  
308 *and there's a lot of memories in the old material'.* (White British Female, age  
309 81-85, anxiety symptoms)

310  
311 *'I also write dotty poems and things like that, I've got quite a collection of*  
312 *them...But when I feel, you know, in that mood, sometimes it comes out that*  
313 *way.'* (White British Male, age 86-90, depression symptoms)

314  
315 Some male participants, in particular, had taken on new self-directed projects, which  
316 were often sedentary and sometimes facilitated by the use of technology; for  
317 example, researching local history, programming or constructing family trees.

318

319 *'Everyday, most days, and I'm doing the family history. I'm just tracing right*

320 *back to my ancestors.'* (White British Male, age 86-90, depression symptoms)

321

322 Searching for meaning could manifest itself as a need to be productive, have a sense of

323 purpose or contribute towards something, for example by volunteering or finding a new

324 project in life.

325

326 *'Maybe if some people, instead of sitting down and twiddle their thumb, could find*

327 *something to do. You know, it would help. An interest. Find an interest in life.'* (Black

328 Caribbean Female, age 86-90, depression symptoms)

329

330 *'And I think they should do more things, not silly things, not like birthday cards*

331 *and like that, but things – even if you're knitting squares for people all to sew*

332 *together, to send to Africa or something, you know.'* (White British Female,

333 age 81-85, anxiety symptoms)

334

335 The desire to be productive could offset feelings of dependency, associated with

336 participants' frailty. However, these wishes were sometimes expressed as hypothetical

337 statements rather than as practical plans, either because participants were not aware of

338 available services or organizations that could help them realize their aspirations or because

339 their frailty prevented them from doing so.

340

341 *'I mean if I could help somebody else you know, I feel, you know, and then*

342 *probably that would help me'*. (White British Female, age 76-80, depression

343 symptoms)

344

345 *'I mean I do want to get out of this, you know, and sort of to feel...like a normal*

346 *person sort of thing, doing things or helping somebody. That's the thing.*

347 *Instead of just somebody helping me you know.'* (White British Female, age

348 76-80, depression and anxiety symptoms)

349

## 350 **Socializing**

### 351 **Camaraderie and connectivity**

352 Despite participants' frailty, many found ways to stay connected to family and friends,  
353 for example via the telephone or through attending local groups, while a few also used social  
354 media, particularly if they difficulties going out. Many participants cited speaking to friends,  
355 peers and spouses as useful forms of informal support. The value of this seemed to be  
356 underpinned by a sense of shared life experience and camaraderie, both in reviewing the  
357 past but also in facing the existential uncertainty of the future:

358  
359 *'But I think most of us are very philosophical about things like that, because*  
360 *we're together and we're in the same boat. So we laugh about it, you know.*

361 *Sometimes the humor is very black. But, it helps, you know.'* (White British  
362 Male, age 86-90, depression symptoms)

363  
364 Many valued the reciprocal exchange of advice, as it drew on personal experiences and  
365 enhanced feelings of altruism. In addition to supporting mental wellbeing, exchange of  
366 advice around services providing help with practical things, such as finances, could also help  
367 people to overcome problems negatively affecting their mental health.

368  
369 *'So a lot of connection happens out of just, you know, pulling together on*  
370 *shared things'. (White British Male, age 76-80, depression symptoms)*

371  
372 Some participants remained depressed or anxious despite having good social links,  
373 particularly if they were experiencing more severe symptoms, although many still highlighted  
374 the positive aspects of having social support in keeping them going, in contrast to those who  
375 were more socially isolated and did not have significant family or friend networks.

376  
377 *'I mean some of these poor people here [in sheltered housing block], they really are*  
378 *on their own, full stop, yes. And I don't know how they do it.'* (White British Male, age  
379 86-90, depression symptoms)

## 380 **Control**

381 Interestingly, attitudes to formalized peer support groups or Day Centers, where  
382 people were grouped on the basis of age alone, were much less positive. Many participants  
383 expressed resistance to being labelled as 'old', did not identify with others in the group, or  
384 were frequently irritated by them.

385  
386 *'The girls keep saying to me, 'Go to the old people's clubs'. And to be honest*  
387 *with you, I wouldn't want to go up there and sit with all them farts and you*  
388 *know eat fish and chips or a roll and coffee. It's not me'. (White British Male,*  
389 *age 86-90, depression symptoms)*

390  
391 Some participants displayed a preference for being around younger people, who they felt  
392 were less likely to 'make them miserable'. Being able to exert some control over whom they  
393 talked to, where and when, seemed to be an important aspect of 'informal' support that  
394 made it work for them, and many disliked the artificiality of organized groups. Some  
395 participants felt that setting up more *relaxed* environments or spaces, such as that provided  
396 within sheltered housing, might be useful.

397  
398 *'Yes, I think there should be more places set up where people can go and*  
399 *talk'. (White British Female, age 76-80, depression symptoms)*

400  
401 Shared interest groups were also mentioned as potentially useful and were more acceptable  
402 than 'old people's groups'. Participants tended to rely on recommendations from friends and  
403 family, rather than actively seeking out information about local groups themselves.

404

## 405 **Internal mental and emotional coping strategies**

406 Participants demonstrated a range of internal strategies to deal with their symptoms  
407 of depression and anxiety. These strategies were varied and depended on participants'  
408 personalities, values and life experiences.

## 409 **Endurance, resilience and stoicism**

410 Many participants reported a range of previous traumatic life experiences, including  
411 evacuation and bombing during the Blitz, family bereavements (with four participants having  
412 experienced the death of adult children), and physical, sexual and emotional abuse.

413 Many highlighted their generation's way of dealing with trauma, characterized by resilience  
414 developed through stoicism, and how this had shaped their own coping mechanisms,  
415 particularly for depression. For some, this underpinned a positive way of self-managing  
416 depressive symptoms. Because they had survived more severe episodes in the past, they  
417 felt that they knew from experience that periods of low mood were likely to pass with time if  
418 they remained resilient and rode it out.

419  
420 *'I think we've all come from a generation that's fairly stoic, with the war years*  
421 *and that...Mum didn't have to do everything for you and all the rest of it. And*  
422 *so when these things come along, you've got that experience, it helps you*  
423 *cope'. (White British Male, age 86-90, depression symptoms)*

424  
425 However, others felt that this approach was not helpful and that not dealing with the trauma  
426 at the time had caused them to repress painful memories, which consequently had lasting  
427 negative effects on their mental health.

428  
429 *[Referring to her brother's suicide] 'We didn't deal with it as a family...at one*  
430 *point I was trying, I was saying that I thought it would be really good for us to*  
431 *have some family therapy. But they wouldn't all agree.'* (White British Female,  
432 *age 71-75, depression and anxiety symptoms)*

433  
434 Drawing on life experience appeared to be employed less for anxiety symptoms, which were  
435 often exacerbated by newer health concerns and existential fears about the future (e.g.  
436 preparedness around death and dying, financial cost of funerals, sorting out inheritance) -  
437 worries that were much less familiar, and for which they needed to develop new coping  
438 strategies.

439

440 *'I think, "Ooh, I'd better get the will sorted out.".....Silly things that really don't*

441 *matter because I won't be here anyway. I want it all to run smoothly and [for*

442 *my children] to get their fair share of what's due to them.'* (White British Male,

443 age 76-80, depression and anxiety symptoms)

444

445 *'I know we're getting old and I can see the future is not good ahead. And I just*

446 *can't see where we're going and what we're doing.'* (White British Female, age

447 86-90, depression & anxiety)

## 448 **Acceptance**

449 Many participants demonstrated an acceptance of their situation, recognizing that

450 some things were outside of their control.

451

452 *'But there are certain things that you have no power over. And I think when*

453 *you realize that, you can, you can be more content'.* (White British Male, age

454 76-80, depression and anxiety symptoms)

455

456 Some felt that accepting your emotions and being allowed to occasionally wallow or have a

457 'good cry' were helpful outlets for their feelings.

458

459 *'Sometimes I think oh what's the matter with me and then I sort of get that feeling –*

460 *it's a frightened feeling. And then I cry and then I feel better.'* (White British Female,

461 age 81-85, depression and anxiety symptoms)

## 462 **Addressing the cause**

463 Many of those living with depression in particular, felt that they were aware of the

464 causes of their depression, particularly if they had experienced previous episodes. They

465 often demonstrated pragmatic outlooks, locating perceived solutions within their internal

466 control rather than in external interventions (e.g. psychological therapies or antidepressants).

467

468 *'If it's, you know, the reason why you're depressed you try to look at the, the*  
469 *cause and you know, focus on that really, and not rely on medication'. (White*  
470 *British Female, age 76-80, depression symptoms)*

471  
472 *'But I think I can rationalise it a bit more now than I used to. You know, I've had that*  
473 *much more experience. And, of course, that earlier [depressive] episode in life has*  
474 *taught me a lot.'* (White British Male, age 86-90, depression symptoms)

475  
476 However, those who reported experiencing more severe depression and/or anxiety often  
477 expressed a sense of hopelessness or resignation, particularly if they lacked social support,  
478 as they were aware of the causes but were unable to resolve these (e.g. past trauma, family  
479 conflict). Anxiety, in particular, seemed more difficult to rationalize, and participants had  
480 difficulty recognizing, processing and gaining perspective on their symptoms. Often, they  
481 could not identify why they felt anxious, which meant they could not address its cause, or it  
482 was a realistic anxiety (e.g. fear of falling, death, deteriorating health, worries about getting  
483 dementia), or they minimized it and put it down to 'silly little things'. Consequently they often  
484 downplayed their symptoms and rarely sought help unless their symptoms were severe.

485  
486 *'Now I find that the slightest thing, it doesn't matter what it is, the smallest*  
487 *thing, which is ridiculous, is enough for me to then start to worry.'* (White  
488 *British Male, age 76-80, depression & anxiety symptoms)*

489  
490 *'But I am terrified at not dying and people thinking I'm dead. ...And being*  
491 *buried alive. Or even being in a coffin alive or even being in a body bag alive.*  
492 *And in fact generally I feel it's a claustrophobic thing. That can actually bring*  
493 *on really strong feelings of panic and phobia, which is irritating you know,*  
494 *because it's very irrational.'* (White British Male, age 81-85, depression and  
495 *anxiety symptoms)*

## 496 **Distraction and avoidance**

497 Nearly all participants described using distraction and avoidance to not dwell on  
498 things that made them feel sad or anxious; for example, watching television, playing  
499 Mahjong or doing crossword puzzles. Whilst most accepted that this was not a long-term fix,  
500 distraction was employed to a greater degree by those who felt that their problems lacked  
501 solutions, for example, those with chronic pain, financial problems or multiple health issues.

502  
503 *'As soon as I start playing Mahjong, I forget what's going on. I forget my*  
504 *[chronic] pain. I forget I'm down...'* (White British Female, age 76-80,  
505 depression symptoms)

506  
507 *'I just put the television [on] to keep my mind off [financial problems, multiple chronic*  
508 *health conditions]. I just watch television and I, I don't even remember, I put the*  
509 *television so loud.'* (South Asian Female, age 76-80, depression and anxiety  
510 symptoms)

511  
512 Avoidance of triggering situations (such as going out or using public transport) appeared to  
513 be viewed as a short-term solution by some, especially those experiencing anxiety, but could  
514 lead to increased isolation and was not viewed as helpful in the long-term.

515  
516 *'But because that is my fear, you know. I don't, wouldn't like to go out and anything,*  
517 *anything happen, and I'm outside on the road and nobody don't know who I am. And*  
518 *so that's why I stay indoors.'* (Black Caribbean Female, age 76-80, anxiety  
519 symptoms)

## 520 **Having faith**

521 Eight female participants, nearly all of whom were from Christian backgrounds,  
522 mentioned their faith as important in helping them cope with their depression and /or anxiety  
523 symptoms. Some felt being *listened to* by God and being able to have an internal dialogue  
524 were useful, whilst others felt that being able to see their lives as part of God's plan and

525 having trust in Him were important in gaining perspectives on their situations. For some, the  
526 act of prayer in itself was seen as therapeutic.

527

528 *'By the time I've finished with that prayer, I'm well.'* (Black Caribbean Female, age  
529 76-80, anxiety symptoms)

530

531 *'I think my Christian faith and getting grace of strength that helped me keep going  
532 through it all.'* (White British Female, age 76-80, depression symptoms)

533

## 534 **Discussion**

535 We interviewed 28 frail older adults (aged 75+), who described a number of  
536 approaches and strategies for self-managing depression and/or anxiety symptoms.  
537 Upholding personal routines and engaging in meaningful activities were important in  
538 nurturing a sense of identity and independence, which participants feared losing as part of  
539 their frailty. Meaningful activities for frailer older people were often those that were creative  
540 or productive, such as craftwork, photography, music, writing and researching, which could  
541 easily be undertaken at home in the context of their frailty. In our study, frail older adults  
542 found fostering their own social connections important in promoting a sense of camaraderie  
543 and positivity, which helped them manage their mood. This was facilitated through local  
544 groups and increased use of phones and social media where participants left the home less  
545 often. Internal mental and emotional coping strategies employed were varied and shaped  
546 according to earlier life experiences, values and contexts. Endurance and stoicism could  
547 foster a sense of resilience towards current and future adverse circumstances for some, but  
548 for others could lead to unresolved issues. Acceptance of situations beyond their control and  
549 attempting to solve underlying causes were used to manage depressive symptoms, but  
550 anxiety was harder to rationalize and cope with as it rarely had a clear cause. Participants  
551 also used distraction and avoidance, which was helpful for severe symptoms and situations

552 that could not be changed, but this could be maladaptive if it stopped people doing activities  
553 such as going out.

554 Our findings suggest that frail older people use similar strategies to self-manage low  
555 mood as robust younger-old people, with sociability, self-efficacy, resilience and life  
556 experience being important themes [25, 53, 54]. Frailty limited the use of some self-  
557 management strategies, such as going out or exercising, but participants were able to find  
558 alternative activities that were meaningful to them. This is in agreement with existing  
559 research that meaningful activities reduce depression in older adults [65] and that meaning  
560 is an important enabler for self-management [55]. However, previous studies have focused  
561 mainly on outside interventions or ways to increase engagement with existing services. In  
562 line with the recent literature [42, 55, 56], results from our study suggest that interventions  
563 should facilitate older adults to draw on the wealth of internal mental and emotional coping  
564 strategies utilized to manage their mood without accessing formal support; a finding that has  
565 also been highlighted as important in the management of loneliness in older adults [66] .

566 Whilst previous research has suggested that self-management may be helpful for  
567 anxiety [67], this relies on older adults having the tools to successfully manage anxiety. A  
568 major finding from our study suggests that anxiety, often underpinned by newer health fears  
569 and worries about the future, may be more difficult to self-manage than depression as most  
570 frail older adults interviewed had not developed effective coping strategies for this other than  
571 distraction and avoidance [68]. Only 2 participants in our sample mentioned relaxation  
572 techniques such as controlled breathing and meditation, suggesting simple advice or  
573 resources to raise awareness of these kind of techniques may be helpful. Findings from a  
574 sister paper [61] have also highlighted uncertainty about the validity of seeking professional  
575 help for anxiety amongst frail older adults. The conclusion from both papers, in keeping with  
576 other international qualitative studies on anxiety in older adults [69, 70], suggests more work  
577 needs to be done to raise awareness of anxiety as a diagnosis and find helpful ways of  
578 ameliorating anxiety symptoms in this population.

## 579 **Strengths and weaknesses**

580 We captured a wide range of views from older adults from a variety of socioeconomic  
581 backgrounds, degrees of frailty and symptom severity. We placed an equal focus on both  
582 symptoms of anxiety and depression, which are often interconnected and demonstrate high  
583 levels of comorbidity [71]. Our topic guide and thematic framework were developed with a  
584 range of team member and PPI perspectives. We found no noteworthy differences in self-  
585 management according to socioeconomic background or gender. However, we had a low  
586 response rate from more severely frail older adults (e.g. from nursing homes), older men,  
587 ethnic minority groups and non-English speakers. In our sample, relatively few reported a  
588 formal diagnosis of anxiety and/or depression, which may reflect low rates of help-seeking  
589 and diagnosis in this population, or that the experiences of those with more severe  
590 symptoms may not have been fully explored. We were unable to access participants'  
591 medical notes to verify self-reported diagnoses, and we did not collect specific data on  
592 current or previous treatments, although about two thirds of our sample reported having tried  
593 antidepressants. Furthermore, as participants were all currently experiencing some degree  
594 of low mood and/or anxiety symptoms, the longer-term impact of these self-management  
595 strategies was unclear, and we did not objectively assess symptom severity. It is therefore  
596 possible that individuals may perceive their strategies to be effective when they are not in  
597 the longer-term, and future prospective studies are needed to explore the effectiveness of  
598 different self-management strategies. Finally, the results of this study reflect the views of a  
599 high-income Western country with free national healthcare and may not be transferrable to  
600 lower-income countries, which may have higher levels of frailty and more limited resources  
601 [72].

## 602 **Implications**

603 Information and advice for frail older adults to address depression and anxiety should  
604 communicate techniques that are acceptable and helpful (e.g. maintaining routines,  
605 meaningful activities, finding ways to socialize despite limited mobility), as well as

606 highlighting the benefits and limitations of self-management techniques that may vary  
607 according to personality, situation and symptoms (e.g. acceptance, stoicism, distraction).  
608 Frail older adults should be encouraged to reflect on what has helped them in the past and  
609 what is meaningful for them. Further awareness needs to be raised regarding anxiety and  
610 ways in which frail older people can self-manage such symptoms. However, as frail older  
611 adults rarely seek mental health information from sources other than their GP [27, 61] (whom  
612 they may delay seeing until symptoms are severe), multiple avenues are likely to be needed  
613 to communicate these, such as through voluntary community and social enterprise (VCSE)  
614 organizations, healthcare settings (e.g. waiting room posters/leaflets, pharmacists) and  
615 interactions with healthcare professionals.

616 GPs might help frail older adults maintain their independence for longer by early  
617 referral to multidisciplinary services and relevant social prescribing services. As in other  
618 studies, we found that meaningful social activities were important [73], and that older adults  
619 preferred informal social groups of their own choosing rather than formalized groups which  
620 collectively labelled them as 'old' [74, 75]. Previous studies have highlighted a high degree of  
621 internalized ageism in older adults' attitudes [25], which is often associated with negative  
622 health outcomes [76]. Our study highlighted that control over who they talked to and in what  
623 environment was important for our participants. Creating community spaces for frail older  
624 adults to get together or offering inter-generational groups that center around a common  
625 interest may be useful for improving wellbeing in this group. For those with mobility  
626 limitations, these spaces may need to be incorporated closer to home, e.g. within sheltered  
627 housing, with encouragement to use remote forms of communication such as phone and  
628 video calling. VCSE workers would be well-placed to help frail older adults identify available  
629 appropriate services and could receive training to provide basic advice on self-management  
630 techniques. A recent study looked at the benefits of a guided self-management approach for  
631 anxiety in older veterans [77]. This may help with recognition and understanding of these  
632 symptoms which were clearly troubling for many of our participants.

633

## 634 **Conclusion**

635           There is an urgent need for mental health support for older adults, given the context  
636 of an increasingly ageing global population, and the need is even greater in wake of the  
637 Covid-19 pandemic [20], which has also put additional pressures on mental health services  
638 and increased waiting times [23]. For frail older adults with mood disorders, self-  
639 management may have an important and acceptable role in maintaining wellbeing,  
640 preventing relapse and providing an adjunct to other treatments, as well as offering an  
641 alternative to formal treatment for those with less severe symptoms, those who are on  
642 waiting lists for therapy or who are not able or willing to engage with services. Our research  
643 suggests that frailty limits some strategies used to self-manage mood, but that people adapt  
644 their self-management techniques to account for this, for example, focusing more on  
645 sedentary, creative pursuits or maintaining routines. Helping frail older adults maintain  
646 independence and engage in meaningful and social activities were all identified as  
647 potentially important in the self-management of depression and anxiety in this population.  
648 Supporting frail older adults' internal coping strategies may be useful for dealing with  
649 depression; however, those with anxiety may need further advice and techniques to manage  
650 their symptoms. Self-management support is likely to be more helpful when tailored to the  
651 individual, taking into account personal preferences, life experiences, levels of functioning  
652 and available resources.

653

## 654 **Acknowledgements**

655           We would like to thank our PPI representatives, Wes Dowridge and Shamime Lakda,  
656 for their valuable input throughout this project.

657

## 658 **References**

- 659 1. Collard RM, Boter H, Schoevers RA, Oude Voshaar RC. Prevalence of frailty in  
660 community-dwelling older persons: a systematic review. *J Am Geriatr Soc.*  
661 2012;60(8):1487-92. doi: 10.1111/j.1532-5415.2012.04054.x.
- 662 2. Clegg A, Hassan-Smith Z. Frailty and the endocrine system. *Lancet Diabetes*  
663 *Endocrinol.* 2018;6(9):743–52.
- 664 3. Fried LP, Tangen CM, Walston J, Newman AB, Hirsch C, Gottdiener J, et al. Frailty  
665 in older adults: evidence for a phenotype. *J Gerontol A Biol Sci Med Sci.*  
666 2001;56(3):M146-56.
- 667 4. Grenier A. Constructions of frailty in the English language, care practice and the  
668 lived experience. *Ageing Soc.* 2007;27(3):425–45.
- 669 5. Rodda J, Walker Z, Carter J. Depression in older adults. *BMJ.* 2011;343(sep28  
670 1):d5219.
- 671 6. Bryant C, Jackson H, Ames D. The prevalence of anxiety in older adults:  
672 methodological issues and a review of the literature. *J Affect Disord.*  
673 2008;109(3):233–50.
- 674 7. Ní Mhaoláin AM, Fan CW, Romero-Ortuno R, Cogan L, Cunningham C, Kenny R-A,  
675 et al. Frailty, depression, and anxiety in later life. *Int Psychogeriatr.*  
676 2012;24(8):1265–74.
- 677 8. Blackburn P, Wilkins-Ho M, Wiese BS. Depression in older adults: Diagnosis and  
678 management. *British Columbia Medical Journal.* 2017;59(3):171–7.
- 679 9. Potter GG, McQuoid DR, Whitson HE, Steffens DC. Physical frailty in late-life  
680 depression is associated with deficits in speed-dependent executive functions:  
681 Frailty and executive dysfunction in LLD. *Int J Geriatr Psychiatry.* 2016;31(5):466–  
682 74.

- 683 10. Livingston G, Huntley J, Sommerlad A, Ames D, Ballard C, Banerjee S, et al.  
684 Dementia prevention, intervention, and care: 2020 report of the Lancet Commission.  
685 Lancet. 2020;396(10248):413–46.
- 686 11. Pocklington C. Depression in older adults. British Journal of Medical Practitioners.  
687 2017;10(1).
- 688 12. Meeks TW, Vahia IV, Lavretsky H, Kulkarni G, Jeste DV. A tune in “a minor” can “b  
689 major”: a review of epidemiology, illness course, and public health implications of  
690 subthreshold depression in older adults. J Affect Disord. 2011;129(1–3):126–42.
- 691 13. Wolitzky-Taylor KB, Castriotta N, Lenze EJ, Stanley MA, Craske MG. Anxiety  
692 disorders in older adults: a comprehensive review. Depress Anxiety.  
693 2010;27(2):190–211.
- 694 14. Dent E, Hoogendijk EO. Psychosocial factors modify the association of frailty with  
695 adverse outcomes: a prospective study of hospitalised older people. BMC Geriatr.  
696 2014;14:108.
- 697 15. Mitchell AJ, Rao S, Vaze A. Do primary care physicians have particular difficulty  
698 identifying late-life depression? A meta-analysis stratified by age. Psychother  
699 Psychosom. 2010;79(5):285–94.
- 700 16. Lee D-CA, Lalor AF, Russell G, Stolwyk R, Brown T, Mcdermott F, et al.  
701 Understanding temporal relationships between depression, falls, and physical  
702 activity in a cohort of post-hospitalized older adults: A breakthrough or a  
703 conundrum? International Psychogeriatrics. 2017;29(10):1681–92.
- 704 17. Hansen MC, Flores DV, Coverdale J, Burnett J. Correlates of depression in self-  
705 neglecting older adults: A cross-sectional study examining the role of alcohol abuse  
706 and pain in increasing vulnerability. J Elder Abuse Negl. 2016;28(1):41–56.
- 707 18. Soysal P, Veronese N, Thompson T, Kahl KG, Fernandes BS, Prina AM, et al.  
708 Relationship between depression and frailty in older adults: A systematic review and  
709 meta-analysis. Ageing Res Rev. 2017;36:78–87.

- 710 19. Herron JW, Mitchell A. Depression and antidepressant prescribing in the elderly.  
711 Prescriber. 2018;29(3):12–7.
- 712 20. De Pue S, Gillebert C, Dierckx E, Vanderhasselt M-A, De Raedt R, Van den  
713 Bussche E. The impact of the COVID-19 pandemic on wellbeing and cognitive  
714 functioning of older adults. Sci Rep. 2021;11(1):4636.
- 715 21. Byers AL, Arean PA, Yaffe K. Low use of mental health services among older  
716 Americans with mood and anxiety disorders. Psychiatr Serv. 2012;63(1):66–72.
- 717 22. NHS Digital. Psychological Therapies: reports on the use of IAPT services. 2020.  
718 Available from: [https://digital.nhs.uk/data-and-](https://digital.nhs.uk/data-and-information/publications/statistical/psychological-therapies-report-on-the-use-of-iapt-services)  
719 [information/publications/statistical/psychological-therapies-report-on-the-use-of-iapt-](https://digital.nhs.uk/data-and-information/publications/statistical/psychological-therapies-report-on-the-use-of-iapt-services)  
720 [services](https://digital.nhs.uk/data-and-information/publications/statistical/psychological-therapies-report-on-the-use-of-iapt-services).
- 721 23. Purrington J, Beail N. The impact of Covid-19 on access to psychological services.  
722 Adv Ment Health Intellect Disabil. 2021;15(4):119–31.
- 723 24. Burroughs H, Lovell K, Morley M, Baldwin R, Burns A, Chew-Graham C. Justifiable  
724 depression': How primary care professionals and patients view late-life depression?  
725 A qualitative study. Family Practice. 2006;23:369–77.
- 726 25. Nair P, Bhanu C, Frost R, Buszewicz M, Walters K. A systematic review and  
727 thematic synthesis of older adults' perceptions, beliefs and attitudes about  
728 depression and its treatment. The Gerontologist. 2019;1–12.
- 729 26. Van Der Weele GM. Response to an unsolicited intervention offer to persons aged  
730 >75 years after screening positive for depressive symptoms: a qualitative study.  
731 International Psychogeriatrics. 2012;24(2):270–7.
- 732 27. Frost R, Beattie A, Bhanu C, Walters K, Ben-Shlomo Y. Management of depression  
733 and referral of older people to psychological therapies: a systematic review of  
734 qualitative studies. Br J Gen Pract. 2019;69(680):e171–81.
- 735 28. MIND. We Still need to talk. A Report on Access to Talking Therapies. 2013.  
736 Available from: [https://www.mind.org.uk/media-a/4248/we-still-need-to-](https://www.mind.org.uk/media-a/4248/we-still-need-to-talk_report.pdf)  
737 [talk\\_report.pdf](https://www.mind.org.uk/media-a/4248/we-still-need-to-talk_report.pdf)

- 738 29. MIND. Digital services for people with mental health problems and digital exclusion  
739 during the coronavirus pandemic. 2020. Available from:  
740 [https://www.mind.org.uk/media/6693/briefing-digital-services-during-coronavirus-](https://www.mind.org.uk/media/6693/briefing-digital-services-during-coronavirus-2020-final.pdf)  
741 [2020-final.pdf](https://www.mind.org.uk/media/6693/briefing-digital-services-during-coronavirus-2020-final.pdf)
- 742 30. Mallery L, MacLeod T, Allen M, McLean-Veysey P, Rodney-Cail N, Bezanson E, et  
743 al. Systematic review and meta-analysis of second-generation antidepressants for  
744 the treatment of older adults with depression: questionable benefit and  
745 considerations for frailty. *BMC Geriatr.* 2019;19(1):306.
- 746 31. Gutiérrez-Valencia M, Izquierdo M, Cesari M, Casas-Herrero Á, Inzitari M, Martínez-  
747 Velilla N. The relationship between frailty and polypharmacy in older people: A  
748 systematic review: Frailty and polypharmacy: A systematic review. *Br J Clin*  
749 *Pharmacol.* 2018;84(7):1432–44.
- 750 32. Walters K, Falcaro M, Freemantle N, King M, Ben-Shlomo Y. Sociodemographic  
751 inequalities in the management of depression in adults aged 55 and over: an  
752 analysis of English primary care data. *Psychol Med.* 2018;48(9):1504–13.
- 753 33. Gould RL, Coulson MC, Howard RJ. Efficacy of cognitive behavioral therapy for  
754 anxiety disorders in older people: a meta-analysis and meta-regression of  
755 randomized controlled trials. *J Am Geriatr Soc.* 2012;60(2):218–29.
- 756 34. Frost R, Bauernfreund Y, Walters K. Non-pharmacological interventions for  
757 depression/anxiety in older adults with physical comorbidities affecting functioning:  
758 systematic review and meta-analysis. *Int Psychogeriatr.* 2019;31(8):1121–36.
- 759 35. Mohlman J. A community based survey of older adults' preferences for treatment of  
760 anxiety. *Psychol Aging.* 2012;27(4):1182–90.
- 761 36. Polacsek M, Boardman GH, McCann TV. A theory on the components of depression  
762 self-management in older adults. *Qual Health Res.* 2021;31(1):160–71.
- 763 37. Department of Health. Supporting people with long term conditions to self-care.  
764 Department of Health. 2006;29. Available from:

- 765 <https://www.yearofcare.co.uk/sites/default/files/images/Supporting%20people%20with%20long%20term%20conditions.pdf>
- 766
- 767 38. Barlow J, Wright C, Sheasby J, Turner A, Hainsworth J. Self-management
- 768 approaches for people with chronic conditions: a review. *Patient Educ Couns*.
- 769 2002;48(2):177–87.
- 770 39. Houle J, Gascon-Depatie M, Bélanger-Dumontier G, Cardinal C. Depression self-
- 771 management support: a systematic review. *Patient Educ Couns*. 2013;91(3):271–9.
- 772 40. Duggal HS. Self-management of depression: Beyond the medical model. *Perm J*.
- 773 2019;23.
- 774 41. Polacsek M, Boardman GH, McCann TV. Help-seeking experiences of older adults
- 775 with a diagnosis of moderate depression. *Int J Ment Health Nurs*. 2019;28(1):278–
- 776 87.
- 777 42. Polacsek M, Boardman GH, McCann TV. Factors influencing self-management of
- 778 depression in older adults: a qualitative study. *Aging Ment Health*. 2020;24(6):939–
- 779 46.
- 780 43. Reynolds K, Medved M, Mackenzie CS, Funk LM, Koven L. Older adults' narratives
- 781 of seeking mental health treatment: Making sense of mental health challenges and
- 782 “muddling through” to care. *Qual Health Res*. 2020;30(10):1517–28.
- 783 44. Jonker AAGC, Comijs HC, Knipscheer KCPM, Deeg DJH. Promotion of self-
- 784 management in vulnerable older people: a narrative literature review of outcomes of
- 785 the Chronic Disease Self-Management Program (CDSMP). *Eur J Ageing*.
- 786 2009;6(4):303–14.
- 787 45. Kastner M, Cardoso R, Lai Y, Treister V, Hamid JS, Hayden L, et al. Effectiveness of
- 788 interventions for managing multiple high-burden chronic diseases in older adults: a
- 789 systematic review and meta-analysis. *CMAJ*. 2018;190(34):E1004–12.
- 790 46. Wagner EH, Austin BT, Davis M, Hindmarsh M, Schaefer J, Bonomi A. Improving
- 791 chronic illness care: Translating evidence into action. *Health Aff Millwood*. 2001;64–
- 792 78.

- 793 47. Gilbody S, Bower P, Fletcher J, Richards D, Sutton AJ. Collaborative care for  
794 depression: a cumulative meta-analysis and review of longer-term outcomes: A  
795 cumulative meta-analysis and review of longer-term outcomes. *Arch Intern Med.*  
796 2006;166(21):2314–21.
- 797 48. Miller CJ, Grogan-Kaylor A, Perron BE, Kilbourne AM, Woltmann E, Bauer MS.  
798 Collaborative chronic care models for mental health conditions: cumulative meta-  
799 analysis and metaregression to guide future research and implementation. *Med*  
800 *Care.* 2013;51(10):922–30.
- 801 49. Woltmann E, Grogan-Kaylor A, Perron B, Georges H, Kilbourne AM, Bauer MS.  
802 Comparative effectiveness of collaborative chronic care models for mental health  
803 conditions across primary, specialty, and behavioral health care settings: systematic  
804 review and meta-analysis. *Am J Psychiatry.* 2012;169(8):790–804.
- 805 50. Van Grieken RA, van Tricht MJ, Koeter MWJ, van den Brink W, Schene AH. The  
806 use and helpfulness of self-management strategies for depression: The experiences  
807 of patients. *PLoS One.* 2018;13(10):e0206262.
- 808 51. Villaggi B, Provencher H, Coulombe S, Meunier S, Radziszewski S, Hudon C, et al.  
809 Self-management strategies in recovery from mood and anxiety disorders. *Glob*  
810 *Qual Nurs Res.* 2015;2:2333393615606092.
- 811 52. Turner A, Realpe AX, Wallace LM, Kosmala-Anderson J. A co-produced self-  
812 management programme improves psychosocial outcomes for people living with  
813 depression. *Ment Health Rev (Brighton).* 2015;20(4):242–55.
- 814 53. Corcoran J, Brown E, Davis M, Pineda M, Kadolph J, Bell H. Depression in older  
815 adults: a meta-synthesis. *J Gerontol Soc Work.* 2013;56(6):509–34.
- 816 54. Holm AL, Severinsson E. Surviving depressive ill-health: a qualitative systematic  
817 review of older persons' narratives: Surviving depressive ill-health. *Nurs Health Sci.*  
818 2014;16(1):131–40.

- 819 55. Polacsek M, Boardman GH, Mccann TV. A (2021a): Self Identity and Meaning in  
820 Life as Enablers for Older Adults to Self-Manage Depression. *Issues in Mental*  
821 *Health Nursing*.
- 822 56. Smit D, Peelen J, Vrijzen JN, Spijker J. An exploration of the conditions for  
823 deploying self-management strategies: a qualitative study of experiential knowledge  
824 in depression. *BMC Psychiatry*. 2020;20(1):210.
- 825 57. Benraad CEM, Kamerman-Celie F, van Munster BC, Oude Voshaar RC, Spijker J,  
826 Olde Rikkert MGM. Geriatric characteristics in randomised controlled trials on  
827 antidepressant drugs for older adults: a systematic review: Geriatric characteristics  
828 in antidepressant drug RCTs. *Int J Geriatr Psychiatry*. 2016;31(9):990–1003.
- 829 58. World Medical Association Declaration of Helsinki: ethical principles for medical  
830 research involving human subjects. *JAMA*. 2013 Nov 27;310(20):2191-4. doi:  
831 10.1001/jama.
- 832 59. Li C, Friedman B, Conwell Y, Fiscella K. Validity of the Patient Health Questionnaire  
833 2 (PHQ-2) in identifying major depression in older people: Validity of phq-2 in  
834 detecting depression. *J Am Geriatr Soc*. 2007;55(4):596–602.
- 835 60. Wild B, Eckl A, Herzog W, Niehoff D, Lechner S, Maatouk I, et al. Assessing  
836 generalized anxiety disorder in elderly people using the GAD-7 and GAD-2 scales:  
837 results of a validation study. *Am J Geriatr Psychiatry*. 2014;22(10):1029–38
- 838 61. Frost R, Nair P, Aw S, Gould RL, Kharicha K, Buszewicz M, et al. Supporting frail  
839 older people with depression and anxiety: a qualitative study. *Aging Ment Health*.  
840 2020;24(12):1977–84.
- 841 62. Independent Age. Dealing with depression: How to recognise the signs and the  
842 action you can take. 2017. Available from:  
843 [https://www.independentage.org/information/advice-guides-factsheets-](https://www.independentage.org/information/advice-guides-factsheets-leaflets/dealing-depression)  
844 [leaflets/dealing-depression](https://www.independentage.org/information/advice-guides-factsheets-leaflets/dealing-depression)

- 845 63. Lincoln Y, Guba E. Paradigmatic controversies, contradictions and emerging  
846 confluences. In: Denzin N, Lincoln, Y, editors. *The Landscape of Qualitative*  
847 *Research: Theories and Issues*. London: SAGE Publications Inc; 2003. p. 253–91.
- 848 64. QSR International Pty Ltd. NVivo qualitative data analysis software, Version 12.  
849 2018. Available from: [https://www.qsrinternational.com/nvivo-qualitative-data-](https://www.qsrinternational.com/nvivo-qualitative-data-analysis-software/home?_ga=2.154458939.2014665091.1643195778-2060129496.1643195778)  
850 [analysis-software/home?\\_ga=2.154458939.2014665091.1643195778-](https://www.qsrinternational.com/nvivo-qualitative-data-analysis-software/home?_ga=2.154458939.2014665091.1643195778-2060129496.1643195778)  
851 [2060129496.1643195778](https://www.qsrinternational.com/nvivo-qualitative-data-analysis-software/home?_ga=2.154458939.2014665091.1643195778-2060129496.1643195778)
- 852 65. Fiske A, Wetherell JL, Gatz M. Depression in older adults. *Annu Rev Clin Psychol*.  
853 2009;5(1):363–89.
- 854 66. Kharicha K, Manthorpe J, Iliffe S, Chew-Graham CA, Cattan M, Goodman C, et al.  
855 *Managing loneliness: a qualitative study of older people’s views*. *Aging Ment Health*.  
856 2021;25(7):1206–13.
- 857 67. Shepardson RL, Tapio J, Funderburk JS. Self-management strategies for stress and  
858 anxiety used by nontreatment seeking Veteran primary care patients. *Mil Med*.  
859 2017;182(7):e1747–54.
- 860 68. Taylor SE, Stanton AL. Coping resources, coping processes, and mental health.  
861 *Annu Rev Clin Psychol*. 2007;3(1):377–401.
- 862 69. Kingstone T, Burroughs H, Bartlam B, Ray M, Proctor J, Shepherd T, et al.  
863 *Developing a community-based psycho-social intervention with older people and*  
864 *third sector workers for anxiety and depression: a qualitative study*. *BMC Fam Pract*.  
865 2017;18(1).
- 866 70. Knight BG, Winterbotham S. Rural and urban older adults’ perceptions of 8 mental  
867 health services accessibility. *Aging & Mental Health*. 2019;0:1–7.
- 868 71. Braam AW, Copeland JRM, Delespaul PAEG, Beekman ATF, Como A, Dewey M, et  
869 al. Depression, subthreshold depression and comorbid anxiety symptoms in older  
870 Europeans: results from the EURODEP concerted action. *J Affect Disord*.  
871 2014;155:266–72.

- 872 72. Siriwardhana DD, Hardoon S, Rait G, Weerasinghe MC, Walters KR. Prevalence of  
873 frailty and prefrailty among community-dwelling older adults in low-income and  
874 middle-income countries: a systematic review and meta-analysis. *BMJ Open*.  
875 2018;8(3):e018195.
- 876 73. Forsman AK, Schierenbeck I, Wahlbeck K. Psychosocial interventions for the  
877 prevention of depression in older adults: systematic review and meta-analysis. *J*  
878 *Aging Health*. 2011;23(3):387–416.
- 879 74. Kharicha K, Iliffe S, Manthorpe J, Chew-Graham CA, Cattan M, Goodman C, et al.  
880 What do older people experiencing loneliness think about primary care or  
881 community based interventions to reduce loneliness? A qualitative study in England.  
882 *Health Soc Care Community*. 2017;25(6):1733–42.
- 883 75. Lee SH, Kim YB. Which type of social activities decrease depression in the elderly?  
884 An analysis of a population-based study in South Korea. *Iran J Public Health*.  
885 2014;43(7):903–12.
- 886 76. Robertson G. Ageing and ageism: the impact of stereotypical attitudes on personal  
887 health and well-being outcomes and possible personal compensation strategies.  
888 *Self Soc*. 2017;45(2):149–59.
- 889 77. Gould CE, Carlson C, Wetherell JL, O'Hara R, Goldstein MK, Loup JR, et al. Guided  
890 self-management targeting anxiety and activity participation in older Veterans. *Aging*  
891 *Ment Health*. 2021;25(10):1913–22.
- 892
- 893
- 894
- 895
- 896
- 897
- 898

899

900

901

902

903

904

905

906

907
